# Supplementary material
Source: Springer Nature journal article supplement (https://www.springermedizin.de/resource/supplementary/13063_2006_161_MOESM1_ESM.pdf/9622196)

**Enrolment**

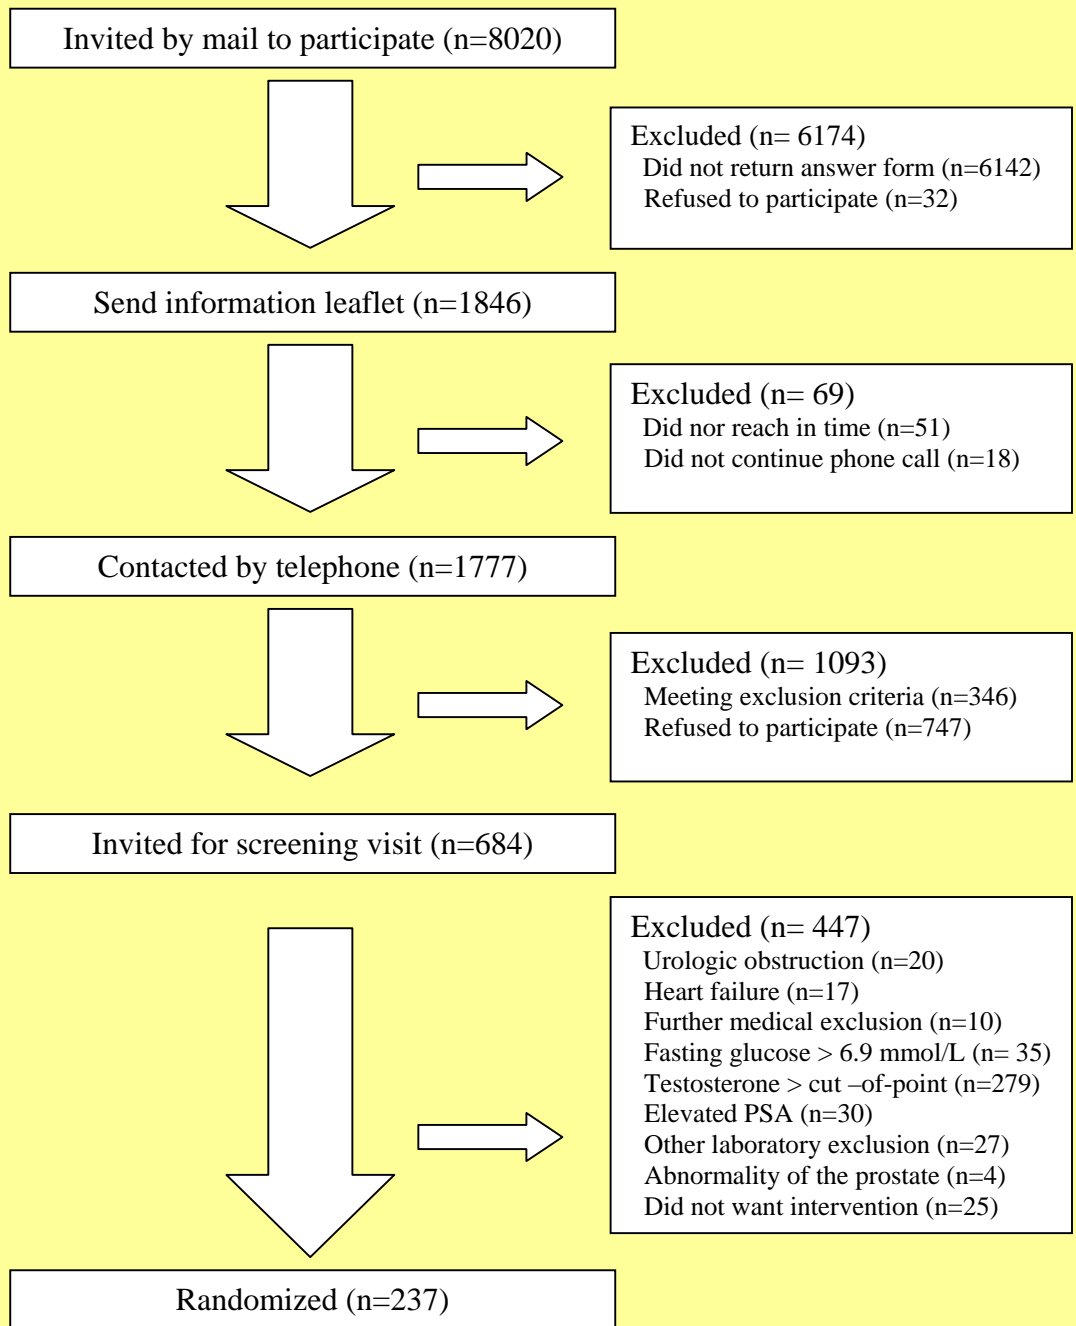

**Allocation**

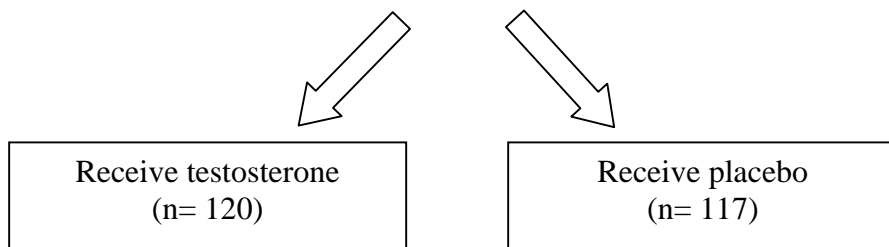

Supplement: MOESM1 [file 9622196]
